# Supplementary material for: Impact of audit and feedback with action implementation toolbox on improving ICU pain management: cluster-randomised controlled trial
Source: PubMed Central journal article supplement (PMC6934240; doi:10.1136/bmjqs-2019-009588), 2019-07-01

Supplementary Figure 1A. Screenshot of details page which presents performance scores over time.

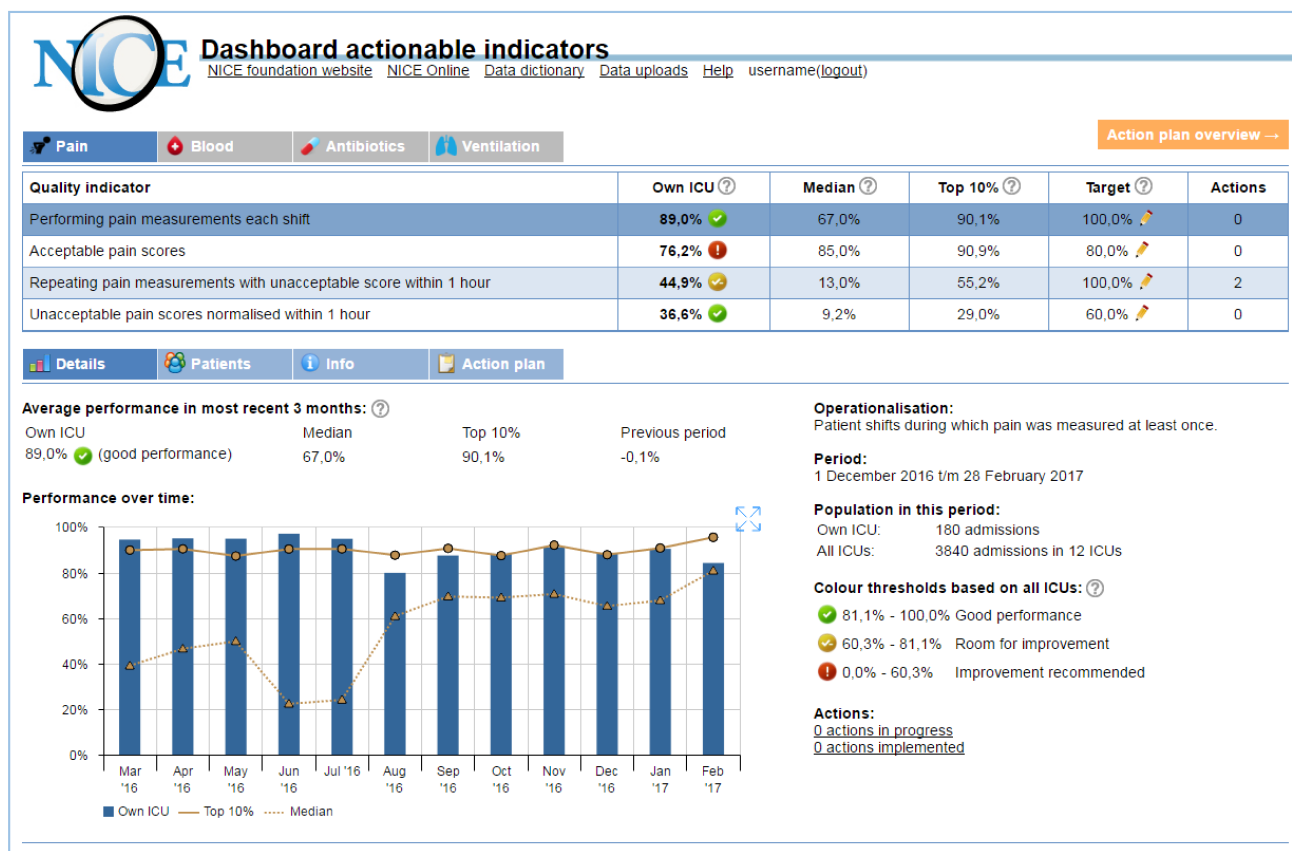

**Supplementary Figure 1B.** Screenshot of patients page which presents performance scores per subgroup.

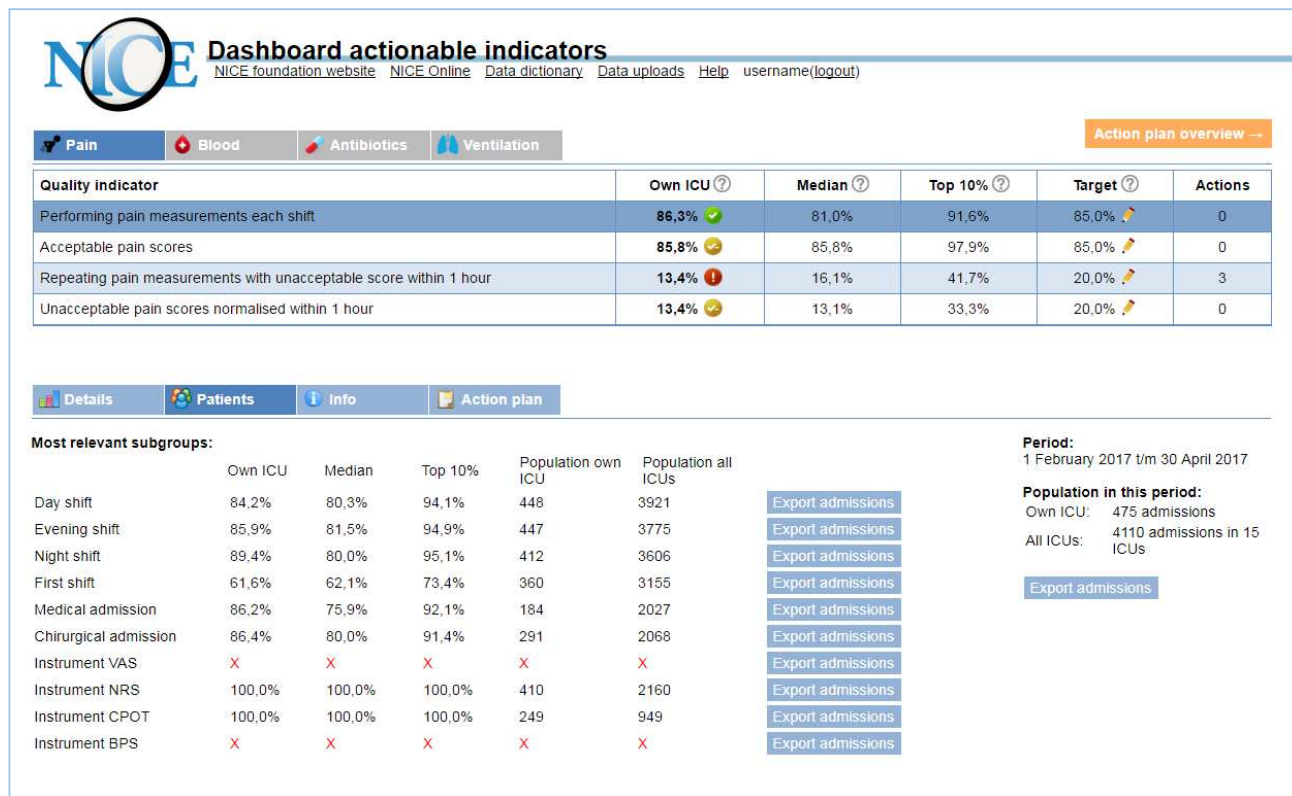

Supplement: bmjqs-2019-009588supp001.pdf [file bmjqs-2019-009588supp001.pdf]
