# Supplementary material for: Impact of audit and feedback with action implementation toolbox on improving ICU pain management: cluster-randomised controlled trial
Source: PubMed Central journal article supplement (PMC6934240; doi:10.1136/bmjqs-2019-009588), 2019-07-01
Supplement: bmjqs-2019-009588supp003.pdf [file bmjqs-2019-009588supp003.pdf]

**Supplementary Table 1.** List of actionable quality indicators to monitor adequate pain management in an ICU.

| Indicator                                                         | Definition                                                                                                                                                                                                                                                              | Indicator type | Numerator                                                                                                                                                                        | Denominator                                                                                      | Optimal value |
|-------------------------------------------------------------------|-------------------------------------------------------------------------------------------------------------------------------------------------------------------------------------------------------------------------------------------------------------------------|----------------|----------------------------------------------------------------------------------------------------------------------------------------------------------------------------------|--------------------------------------------------------------------------------------------------|---------------|
| 1. Performing pain measurements                                   | Percentage of patient-shift observations during which pain was measured at least once.<br><br><i>Specified for subgroups:</i><br>1) type of admission, 2) type of shift                                                                                                 | Process        | Number of patient-shift observations during which pain was measured at least once                                                                                                | Total number of patient-shift observations with or without a pain measurement                    | 100%          |
| 2. Re-measuring unacceptable pain within 1 hour <sup>#</sup>      | Percentage of patient-shift observations during which an unacceptable pain score was measured*, and pain was re-measured within one hour<br><br><i>Specified for subgroups:</i><br>1) type of admission, 2) type of shift                                               | Process        | Number of patient-shift observations during which an unacceptable pain score was measured*, and pain was re-measured within one hour                                             | Total number of patient-shift observations during which an unacceptable pain score was measured* | 100%          |
| 3. Acceptable pain scores <sup>#</sup>                            | Percentage of patient-shift observations during which pain was measured* and no unacceptable pain scores were observed<br><br><i>Specified for subgroups:</i><br>1) type of admission, 2) type of shift                                                                 | Outcome        | Number of patient-shift observations during which pain was measured* and no unacceptable pain scores were observed                                                               | Total number of patient-shift observations during which pain was measured*                       | 100%          |
| 4. Unacceptable pain scores normalized within 1 hour <sup>#</sup> | Percentage of patient-shift observations during which an unacceptable pain score was measured*, and pain was re-measured within one hour indicating that the pain score was normalized<br><br><i>Specified for subgroups:</i><br>1) type of admission, 2) type of shift | Outcome        | Number of patient-shift observations during which an unacceptable pain score was measured*, and pain was re-measured within 1 hour indicating that the pain score was normalized | Total number of patient-shift observations during which an unacceptable pain score was measured* | 100%          |

\*Only pain scores measured with a standardized pain assessment tool, such as the Visual Analog Scale (VAS), Numerical Rating Scale (NRS), Behavioral Pain Scale (BPS), or Critical-Care Pain Observation Tool (CPOT) are included.

<sup>#</sup>Unacceptable pain scores were defined as measurements with a VAS or NRS score of  $\geq 4$ , a CPOT  $\geq 3$  or a BPS  $\geq 6$ . Acceptable or normalized scores were defined as VAS/NRS  $< 4$ , CPOT  $< 3$  and BPS  $< 6$ .
